# Supplementary material for: Brain Injury Is Prevalent and Precedes Tobacco Use among Youth and Young Adults Experiencing Homelessness
Source: MDPI journal article supplement (doi:10.3390/ijerph20065169), 2023-03-15
Supplement: s1 [file s1]

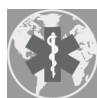

## SUPPLEMENTAL TABLES

**Supplemental Table S1. Associations between the three brain oxygen deprivation exposure items and the composite blunt force head trauma measure; among the full sample with complete data.**

|                                          | No BFHT<br>(n=12) |        | BFHT<br>(n=83) |       | <i>p-value</i> <sup>1</sup> |
|------------------------------------------|-------------------|--------|----------------|-------|-----------------------------|
|                                          | <i>n</i>          | %      | <i>n</i>       | %     |                             |
| <b>Brain Oxygen Deprivation Exposure</b> |                   |        |                |       | <b>&lt;0.001</b>            |
| None                                     | 11                | 91.67  | 22             | 26.83 |                             |
| Any                                      | 1                 | 8.33   | 60             | 73.17 |                             |
| <b>Choking Games</b>                     |                   |        |                |       | <b>1.000</b>                |
| Never                                    | 12                | 100.00 | 72             | 86.75 |                             |
| Once                                     | 0                 | 0.00   | 5              | 6.02  |                             |
| A few times                              | 0                 | 0.00   | 4              | 4.82  |                             |
| Too many times to remember               | 0                 | 0.00   | 2              | 2.41  |                             |
| <b>Intentional Choking</b>               |                   |        |                |       | <b>0.009</b>                |
| Never                                    | 12                | 100.00 | 39             | 46.99 |                             |
| Once                                     | 0                 | 0.00   | 12             | 14.46 |                             |
| A few times                              | 0                 | 0.00   | 25             | 30.12 |                             |
| Too many times to remember               | 0                 | 0.00   | 7              | 8.43  |                             |
| <b>Stopped Breathing on Accident</b>     |                   |        |                |       | <b>0.161</b>                |
| Never                                    | 11                | 91.67  | 42             | 50.60 |                             |
| Once                                     | 1                 | 8.33   | 17             | 20.48 |                             |
| A few times                              | 0                 | 0.00   | 17             | 20.48 |                             |
| Too many times to remember               | 0                 | 0.00   | 4              | 4.82  |                             |
| Don't Know                               | 0                 | 0.00   | 3              | 3.61  |                             |

<sup>1</sup> *p*-value from Fisher exact test

BFHT: blunt force head trauma exposure

**Supplemental Table S2. Associations between the three blunt force head trauma exposure items and the composite brain injury oxygen deprivation measure; among the full sample with complete data**

|                                         | No BOD<br>(n=33) |       | BOD<br>(n=61) |       | <i>p-value</i> <sup>1</sup> |
|-----------------------------------------|------------------|-------|---------------|-------|-----------------------------|
|                                         | <i>n</i>         | %     | <i>n</i>      | %     |                             |
| <b>Blunt Force Head Trauma Exposure</b> |                  |       |               |       | <b>&lt;0.001</b>            |
| None                                    | 11               | 33.33 | 1             | 1.64  |                             |
| Any                                     | 22               | 66.67 | 60            | 98.36 |                             |
| <b>Hit in Head</b>                      |                  |       |               |       | <b>&lt;0.001</b>            |
| Never                                   | 20               | 60.61 | 9             | 14.75 |                             |
| Once                                    | 2                | 6.06  | 8             | 13.11 |                             |
| A few times                             | 8                | 24.24 | 28            | 45.90 |                             |
| Too many times to remember              | 3                | 9.09  | 16            | 26.23 |                             |
| <b>Shaken Violently</b>                 |                  |       |               |       | <b>&lt;0.001</b>            |
| Never                                   | 29               | 87.88 | 26            | 42.62 |                             |
| Once                                    | 0                | 0.00  | 6             | 9.84  |                             |
| A few times                             | 4                | 12.12 | 15            | 24.59 |                             |
| Too many times to remember              | 0                | 0.00  | 13            | 21.31 |                             |
| Don't Know                              | 0                | 0.00  | 1             | 1.64  |                             |

|                            | No BOD<br>(n=33) |       | BOD<br>(n=61) |       |       |
|----------------------------|------------------|-------|---------------|-------|-------|
| Accidentally Hurt          |                  |       |               |       | 0.116 |
| Never                      | 15               | 45.45 | 13            | 21.31 |       |
| Once                       | 6                | 18.18 | 14            | 22.95 |       |
| A few times                | 9                | 27.27 | 23            | 37.70 |       |
| Too many times to remember | 3                | 9.09  | 11            | 18.03 |       |

<sup>1</sup> p-value from Fisher exact test

BOD: brain oxygen deprivation exposure

**Supplemental Table S3. Linear regression models for age first tried tobacco and age first regularly used tobacco among the full sample (N=96)**

|                                                                                   | Age Tried Tobacco                |              |                       |         |
|-----------------------------------------------------------------------------------|----------------------------------|--------------|-----------------------|---------|
|                                                                                   | Unadjusted                       |              | Adjusted <sup>a</sup> |         |
|                                                                                   | Years (95% CI)                   | p-value      | Years (95% CI)        | p-value |
| Brain Oxygen Deprivation Exposure vs. None                                        | -1.15 (-2.69, 0.39)              | 0.141        | -0.87 (-2.49, 0.76)   | 0.292   |
| Blunt Force Head Trauma Exposure vs. None                                         | -0.16 (-2.39, 2.07)              | 0.885        | 1.72 (-0.62, 4.06)    | 0.148   |
| Brain Oxygen Deprivation or Blunt Force Head Trauma Exposure vs. None             | -0.09 (-2.41, 2.22)              | 0.937        | 1.84 (-0.63, 4.31)    | 0.142   |
| Type of Exposure                                                                  |                                  | 0.243        |                       | 0.086   |
| None                                                                              | 0.51 (-1.84, 2.85)               |              | -1.15 (-3.65, 1.35)   |         |
| Single Type                                                                       | 1.49 (-0.26, 3.25)               |              | 1.45 (-0.25, 3.16)    |         |
| Both                                                                              | Reference                        |              | Reference             |         |
| Intentional Brain Oxygen Deprivation Exposure vs. None                            | -0.43 (-1.94, 1.08)              | 0.575        | -0.42 (-1.94, 1.11)   | 0.586   |
| Intentional Blunt Force Head Trauma Exposure vs. None                             | -0.89 (-2.61, 0.83)              | 0.307        | -0.10 (-1.99, 1.80)   | 0.920   |
| Intentional Brain Oxygen Deprivation or Blunt Force Head Trauma Exposure vs. None | -1.24 (-2.98, 0.51)              | 0.163        | -0.39 (-2.28, 1.50)   | 0.683   |
| Type of Intentional Exposure                                                      |                                  | 0.318        |                       | 0.927   |
| None                                                                              | 1.04 (-0.84, 2.92)               |              | 0.40 (-1.65, 2.45)    |         |
| Single Type                                                                       | -0.56 (-2.39, 1.27)              |              | 0.10 (-1.69, 1.89)    |         |
| Both                                                                              | Reference                        |              | Reference             |         |
|                                                                                   | Age First Regularly Used Tobacco |              |                       |         |
|                                                                                   | Unadjusted                       |              | Adjusted              |         |
|                                                                                   | Years (95% CI)                   | p-value      | Years (95% CI)        | p-value |
| Brain Oxygen Deprivation Exposure vs. None                                        | -1.42 (-2.42, -0.41)             | <b>0.006</b> | -0.87 (-1.95, 0.21)   | 0.113   |
| Blunt Force Head Trauma Exposure vs. None                                         | 0.16 (-1.34, 1.66)               | 0.830        | 0.94 (-0.63, 2.51)    | 0.235   |
| Brain Oxygen Deprivation or Blunt Force Head Trauma Exposure vs. None             | 0.09 (-1.46, 1.65)               | 0.907        | 0.81 (-0.85, 2.47)    | 0.335   |

|                                                                                   |                     |              |                     |       |
|-----------------------------------------------------------------------------------|---------------------|--------------|---------------------|-------|
| Type of Exposure                                                                  |                     | <b>0.008</b> |                     | 0.114 |
| None                                                                              | 0.41 (-1.11, 1.93)  |              | -0.30 (-1.99, 1.38) |       |
| Single Type                                                                       | 1.81 (0.67, 2.95)   |              | 1.09 (-0.06, 2.23)  |       |
| Both                                                                              | Reference           |              | Reference           |       |
| Intentional Brain Oxygen Deprivation Exposure vs. None                            | -0.55 (-1.56, 0.45) | 0.276        | -0.47 (-1.48, 0.54) | 0.359 |
| Intentional Blunt Force Head Trauma Exposure vs. None                             | -0.92 (-2.05, 0.21) | 0.108        | -0.05 (-0.31, 1.21) | 0.938 |
| Intentional Brain Oxygen Deprivation or Blunt Force Head Trauma Exposure vs. None | -0.95 (-2.11, 0.21) | 0.108        | -0.08 (-1.34, 1.18) | 0.904 |
| Type of Intentional Injury                                                        |                     | 0.228        |                     | 0.615 |
| None                                                                              | 1.06 (-0.17, 2.30)  |              | 0.36 (-0.99, 1.71)  |       |
| Single Type                                                                       | 0.19 (-1.02, 1.39)  |              | 0.57 (-0.61, 1.75)  |       |
| Both                                                                              | Reference           |              | Reference           |       |

<sup>a</sup>Adjusted for race and the Behavioral Risk Factor Surveillance System Adverse Childhood Experiences Scale
